# Supplementary material for: Structural and policy overview of medical education in Germany
Source: publisher site journal article supplement (doi:10.1515/gme-2024-0016), 2025-01-10
Supplement: Supplementary file 1 [file j_gme-2024-0016_suppl_001.docx]

**Supporting Information**

**Structural and Policy Overview of Medical Education in Germany**

Ya-Qian Xu 1,2, Yuqi Hao 4, Tianchen Chen 3, Xiangwei Li 1,2,*

1. School of Global Health, Chinese Centre for Tropical Diseases Research, Shanghai Jiao Tong University School of Medicine, Shanghai 200025, China.
2. One Health Center, Shanghai Jiao Tong University-The University of Edinburgh, Shanghai 200025, China.
3. College of Stomatology, Shanghai Jiao Tong University School of Medicine, Shanghai 200025, China.
4. School of Basic Medicine, Class of 2022 Clinical Medicine 5-Year III, Shanghai Jiao Tong University School of Medicine, Shanghai 200025, China.

* Corresponding author

Dr. Xiangwei Li

E-mail: li.xiangwei@sjtu.edu.cn

Number of pages: 4

Number of tables: 2

**Table of Contents**

**Table Captions**

Table S1 Interdisciplinary teaching module.

Table S2 List of elective subjects.

**Table S1 Interdisciplinary teaching module.**

| **Number** | **Module name** |
| --- | --- |
| 1 | Epidemiological, Biostatistics, Bioinformatics |
| 2 | History of medicine, Medical theory, Medical ethics |
| 3 | Health economics, Health systems, Public health |
| 4 | Epidemiology, Immunology |
| 5 | Pathology |
| 6 | Environmental medicine |
| 7 | Geriatrics |
| 8 | Emergency medicine |
| 9 | Clinical Pharmacy, Pharmacotherapy |
| 10 | Preventive medicine, Health care |
| 11 | Medical imaging, Radiotherapy, Radiation protection |
| 12 | Rehabilitation medicine, Physiotherapy, Complementary medicine |
| 13 | Palliative medicine |
| 14 | Pain medicine |

**Table S2 List of elective subjects.**

| **Allergology** | **General medicine** | **Anesthesiology** |
| --- | --- | --- |
| Vascular Medicine | Occupational Medicine | Ophthalmology |
| Blood Transfusion | Chiropractic | Surgery |
| Radiology | Endocrinology | Aviation Medicine |
| Obstetrics & Gynecology | Hydrotherapy & Medical Climatology | Gastroenterology |
| Vascular Surgery | Otorhinolaryngology | Hematology |
| Hand Surgery | Dermatology & Venereology | Cardiac Surgery |
| Homeopathy | Human Genetics | Hygiene & Environmental Medicine |
| Internal Medicine | Cardiology | Child and Adolescent Psychiatry |
| Psychotherapy | Pediatric Surgery | Pediatrics |
| Clinical Pharmacology | Pediatric Radiology | Pediatric Cardiology |
| Laboratory Medicine | Medical Genetics | Medical Informatics |
| Microbiology | Infectious Epidemiology | Oral and Maxillofacial Surgery |
| Natural Healing | Neonatology | Nephrology |
| Neurology | Neurosurgery | Neuropathology |
| Neuroradiology | Nuclear Medicine | Public Health |
| Orthopedics | Pathology | Pharmacology & Toxicology |
| Rehabilitation Medicine | Psychoanalysis | Physical Therapy |
| Plastic Surgery | Pulmonology | Forensic Medicine |
| Sports Medicine | Social Medicine | Rheumatology |
| Radiotherapy | Thoracic Surgery | Tropical Medicine |
| Environmental Medicine | Urology | Visceral Surgery |

Source: German Ministry of Justice
